# Supplementary material
Source: publisher site journal article supplement (https://www.spandidos-publications.com/7013/downloadSupplementary)
Supplement: Supplementary file 1 [file downloadSupplementary]

## Sheet: Sheet1
Table SVI. Spearman correlation analysis of PRGs.
from	to	cor	P-value	color	weight
BAK1	BAX	0.196279	4.21678e-11	pink	1.17767
BAK1	CASP1	0.348582	4.62241e-33	pink	2.09149
BAK1	CASP3	0.135577	5.81991e-06	pink	0.813462
BAK1	CASP5	0.263823	3.9405e-19	pink	1.58294
BAK1	CHMP4B	-0.245307	1.12669e-16	#6495ED	1.47184
BAK1	CHMP4C	-0.156402	1.63059e-07	#6495ED	0.938409
BAK1	CHMP6	0.262888	5.30138e-19	pink	1.57733
BAK1	CHMP7	0.209719	1.69049e-12	pink	1.25831
BAK1	GSDMD	0.267752	1.11828e-19	pink	1.60651
BAK1	HMGB1	-0.203658	7.41214e-12	#6495ED	1.22195
BAK1	IL18	0.295615	8.0056e-24	pink	1.77369
BAK1	IL1B	0.212846	7.74583e-13	pink	1.27707
BAK1	IRF1	0.44592	2.44274e-55	pink	2.67552
BAK1	IRF2	0.246822	7.21545e-17	pink	1.48093
BAK1	TP53	0.146339	9.76064e-07	pink	0.878032
BAK1	AIM2	0.295822	7.42669e-24	pink	1.77493
BAK1	CASP9	0.291342	3.71372e-23	pink	1.74805
BAK1	GSDMB	0.294775	1.08468e-23	pink	1.76865
BAK1	GSDMC	0.177367	2.68357e-09	pink	1.0642
BAK1	NLRP3	0.135996	5.4423e-06	pink	0.815977
BAK1	NLRP7	0.17277	6.9036e-09	pink	1.03662
BAK1	NOD1	-0.149862	5.2858e-07	#6495ED	0.899174
BAK1	PLCG1	-0.252645	1.26513e-17	#6495ED	1.51587
BAK1	PYCARD	0.135065	6.31555e-06	pink	0.810388
BAK1	SCAF11	-0.188226	2.60583e-10	#6495ED	1.12936
BAK1	TIRAP	0.173607	5.82291e-09	pink	1.04164
BAK1	TNF	0.144823	1.26512e-06	pink	0.86894
BAK1	GZMA	0.294527	1.1861e-23	pink	1.76716
BAX	CHMP2A	0.316048	3.6069e-27	pink	1.89629
BAX	CHMP6	0.260644	1.07515e-18	pink	1.56386
BAX	GSDMD	0.145201	1.18625e-06	pink	0.871204
BAX	TP53	0.245225	1.1542e-16	pink	1.47135
BAX	CASP6	0.136799	4.78374e-06	pink	0.820791
BAX	NLRP1	-0.1213	5.08422e-05	#6495ED	0.727799
BAX	SCAF11	-0.164281	3.70081e-08	#6495ED	0.985686
CASP1	CASP3	0.258026	2.43176e-18	pink	1.54816
CASP1	CASP5	0.626903	2.91835e-122	pink	3.76142
CASP1	CHMP2B	0.180322	1.443e-09	pink	1.08193
CASP1	CHMP4B	-0.157481	1.33653e-07	#6495ED	0.944885
CASP1	CHMP7	0.146904	8.85504e-07	pink	0.881421
CASP1	CYCS	0.179972	1.55382e-09	pink	1.07983
CASP1	GSDMD	0.181792	1.05543e-09	pink	1.09075
CASP1	GZMB	0.182422	9.22378e-10	pink	1.09453
CASP1	IL18	0.329805	1.41965e-29	pink	1.97883
CASP1	IL1A	0.220744	1.02127e-13	pink	1.32447
CASP1	IL1B	0.226969	1.95707e-14	pink	1.36181
CASP1	IRF1	0.487578	2.3874e-67	pink	2.92547
CASP1	IRF2	0.15481	2.18103e-07	pink	0.928858
CASP1	AIM2	0.365774	1.80669e-36	pink	2.19465
CASP1	CASP6	0.169203	1.41246e-08	pink	1.01522
CASP1	CASP8	0.261392	8.49887e-19	pink	1.56835
CASP1	GPX4	-0.196898	3.65419e-11	#6495ED	1.18139
CASP1	GSDMB	0.438547	2.21622e-53	pink	2.63128
CASP1	NLRC4	0.131744	1.06499e-05	pink	0.790465
CASP1	NLRP6	0.14579	1.07252e-06	pink	0.874739
CASP1	NLRP7	0.228074	1.45179e-14	pink	1.36845
CASP1	PLCG1	-0.323548	1.82552e-28	#6495ED	1.94129
CASP1	PRKACA	-0.128103	1.8621e-05	#6495ED	0.76862
CASP1	GZMA	0.478706	1.19315e-64	pink	2.87223
CASP3	CASP4	0.259817	1.3925e-18	pink	1.5589
CASP3	CASP5	0.224103	4.21291e-14	pink	1.34462
CASP3	CHMP2B	0.509114	3.06752e-74	pink	3.05469
CASP3	CHMP4B	-0.124907	3.00418e-05	#6495ED	0.749442
CASP3	CHMP4C	0.215536	3.91909e-13	pink	1.29322
CASP3	CHMP7	0.182166	9.74363e-10	pink	1.093
CASP3	CYCS	0.30026	1.46529e-24	pink	1.80156
CASP3	HMGB1	0.319529	9.12775e-28	pink	1.91717
CASP3	IL18	0.323332	1.99155e-28	pink	1.93999
CASP3	IL1A	0.194815	5.90593e-11	pink	1.16889
CASP3	IL1B	0.167373	2.02732e-08	pink	1.00424
CASP3	IRF1	0.175317	4.10263e-09	pink	1.0519
CASP3	IRF2	0.511604	4.55104e-75	pink	3.06962
CASP3	AIM2	0.220806	1.00489e-13	pink	1.32484
CASP3	CASP6	0.362705	7.59998e-36	pink	2.17623
CASP3	CASP8	0.331728	6.39843e-30	pink	1.99037
CASP3	GPX4	-0.250854	2.17197e-17	#6495ED	1.50512
CASP3	GSDMB	0.148174	7.10349e-07	pink	0.889047
CASP3	NLRC4	0.170683	1.05131e-08	pink	1.0241
CASP3	NOD1	-0.166754	2.28927e-08	#6495ED	1.00052
CASP3	PLCG1	-0.247995	5.09949e-17	#6495ED	1.48797
CASP3	PYCARD	-0.146792	9.02703e-07	#6495ED	0.880753
CASP3	SCAF11	0.406015	2.6742e-45	pink	2.43609
CASP3	GZMA	0.259644	1.47025e-18	pink	1.55786
CASP4	CHMP2B	0.188406	2.50427e-10	pink	1.13043
CASP4	CHMP4B	-0.216256	3.26099e-13	#6495ED	1.29754
CASP4	CHMP7	0.201395	1.27222e-11	pink	1.20837
CASP4	GSDMD	0.127161	2.14679e-05	pink	0.762963
CASP4	GZMB	0.123875	3.49719e-05	pink	0.743252
CASP4	IL18	0.146221	9.96091e-07	pink	0.877323
CASP4	IL1B	0.20446	6.11103e-12	pink	1.22676
CASP4	IRF1	0.268875	7.77157e-20	pink	1.61325
CASP4	IRF2	0.302767	5.78295e-25	pink	1.8166
CASP4	AIM2	0.224446	3.84551e-14	pink	1.34668
CASP4	CASP6	-0.179542	1.70146e-09	#6495ED	1.07725
CASP4	GSDMC	0.160328	7.85898e-08	pink	0.961965
CASP4	IL6	0.22721	1.83402e-14	pink	1.36326
CASP4	NLRC4	0.333741	2.76e-30	pink	2.00245
CASP4	NLRP1	0.181816	1.05017e-09	pink	1.09089
CASP4	NLRP3	0.291884	3.06167e-23	pink	1.7513
CASP4	NOD2	0.120792	5.46879e-05	pink	0.724752
CASP4	PLCG1	-0.175828	3.69291e-09	#6495ED	1.05497
CASP4	SCAF11	0.205738	4.48647e-12	pink	1.23443
CASP4	GZMA	0.331752	6.33399e-30	pink	1.99051
CASP5	CHMP2B	0.29059	4.85177e-23	pink	1.74354
CASP5	CHMP4C	0.151922	3.66872e-07	pink	0.911534
CASP5	CYCS	0.29672	5.35956e-24	pink	1.78032
CASP5	IL18	0.336614	8.22803e-31	pink	2.01968
CASP5	IL1A	0.22614	2.44568e-14	pink	1.35684
CASP5	IL1B	0.209894	1.61874e-12	pink	1.25936
CASP5	IRF1	0.138635	3.55126e-06	pink	0.83181
CASP5	CASP6	0.268939	7.61281e-20	pink	1.61363
CASP5	CASP8	0.24873	4.09907e-17	pink	1.49238
CASP5	GPX4	-0.284111	4.69901e-22	#6495ED	1.70467
CASP5	GSDMB	0.415049	1.86735e-47	pink	2.49029
CASP5	NLRP7	0.245913	9.43061e-17	pink	1.47548
CASP5	PLCG1	-0.25283	1.19609e-17	#6495ED	1.51698
CASP5	PRKACA	-0.168915	1.49552e-08	#6495ED	1.01349
CASP5	TIRAP	0.12292	4.02104e-05	pink	0.737523
CASP5	GZMA	0.204065	6.72177e-12	pink	1.22439
CHMP2A	CHMP4B	0.415621	1.35655e-47	pink	2.49373
CHMP2A	CHMP6	0.26429	3.39603e-19	pink	1.58574
CHMP2A	IL1A	-0.150342	4.85742e-07	#6495ED	0.902049
CHMP2A	IL1B	-0.149635	5.50145e-07	#6495ED	0.89781
CHMP2A	CASP9	0.147989	7.33676e-07	pink	0.887933
CHMP2A	GPX4	0.134279	7.15517e-06	pink	0.805672
CHMP2A	IL6	-0.119489	6.58478e-05	#6495ED	0.716937
CHMP2A	NLRC4	-0.117072	9.24898e-05	#6495ED	0.70243
CHMP2A	NLRP3	-0.120859	5.41614e-05	#6495ED	0.725157
CHMP2A	PLCG1	0.162313	5.39662e-08	pink	0.973876
CHMP2A	PRKACA	0.132664	9.22591e-06	pink	0.795985
CHMP2A	PYCARD	0.32625	6.10433e-29	pink	1.9575
CHMP2A	SCAF11	-0.168647	1.57707e-08	#6495ED	1.01188
CHMP2A	GZMA	-0.128913	1.64676e-05	#6495ED	0.773475
CHMP2B	CHMP4C	0.28077	1.48083e-21	pink	1.68462
CHMP2B	CHMP6	-0.131386	1.12599e-05	#6495ED	0.788313
CHMP2B	CYCS	0.4579	1.26656e-58	pink	2.7474
CHMP2B	GSDMD	-0.214644	4.91677e-13	#6495ED	1.28787
CHMP2B	HMGB1	0.455526	5.80725e-58	pink	2.73316
CHMP2B	IL18	0.414564	2.44733e-47	pink	2.48738
CHMP2B	IL1A	0.262055	6.89799e-19	pink	1.57233
CHMP2B	IL1B	0.140896	2.44773e-06	pink	0.845379
CHMP2B	IRF2	0.217339	2.46966e-13	pink	1.30404
CHMP2B	TP53	-0.158874	1.03181e-07	#6495ED	0.953246
CHMP2B	AIM2	0.125747	2.65233e-05	pink	0.754481
CHMP2B	CASP6	0.268062	1.01154e-19	pink	1.60837
CHMP2B	CASP8	0.413766	3.81438e-47	pink	2.4826
CHMP2B	GPX4	-0.306813	1.26591e-25	#6495ED	1.84088
CHMP2B	GSDMB	0.167213	2.0922e-08	pink	1.00328
CHMP2B	NLRC4	0.193991	7.13231e-11	pink	1.16394
CHMP2B	NLRP6	-0.166074	2.61398e-08	#6495ED	0.996447
CHMP2B	PLCG1	-0.218069	2.04663e-13	#6495ED	1.30841
CHMP2B	PYCARD	-0.192852	9.24097e-11	#6495ED	1.15711
CHMP2B	SCAF11	0.505593	4.44115e-73	pink	3.03356
CHMP2B	GZMA	0.142386	1.9095e-06	pink	0.854317
CHMP4B	CHMP4C	0.234407	2.54614e-15	pink	1.40644
CHMP4B	CHMP6	0.117007	9.3326e-05	pink	0.702042
CHMP4B	CHMP7	-0.229621	9.53622e-15	#6495ED	1.37772
CHMP4B	HMGB1	0.252322	1.39514e-17	pink	1.51393
CHMP4B	IL18	-0.208286	2.40739e-12	#6495ED	1.24972
CHMP4B	IL1A	-0.27991	1.98486e-21	#6495ED	1.67946
CHMP4B	IL1B	-0.298106	3.23269e-24	#6495ED	1.78863
CHMP4B	IRF1	-0.200304	1.64715e-11	#6495ED	1.20182
CHMP4B	IRF2	-0.1976	3.10402e-11	#6495ED	1.1856
CHMP4B	TP53	-0.157796	1.26081e-07	#6495ED	0.946776
CHMP4B	TP63	-0.133573	7.99844e-06	#6495ED	0.80144
CHMP4B	AIM2	-0.26984	5.67825e-20	#6495ED	1.61904
CHMP4B	CASP6	0.267228	1.3244e-19	pink	1.60337
CHMP4B	CASP8	0.123719	3.57813e-05	pink	0.742316
CHMP4B	GPX4	0.125058	2.93775e-05	pink	0.750349
CHMP4B	GSDMB	-0.175522	3.93328e-09	#6495ED	1.05313
CHMP4B	GSDMC	-0.162545	5.16241e-08	#6495ED	0.975273
CHMP4B	IL6	-0.17093	1.00067e-08	#6495ED	1.02558
CHMP4B	NLRC4	-0.21062	1.3518e-12	#6495ED	1.26372
CHMP4B	NLRP1	-0.143881	1.4845e-06	#6495ED	0.863288
CHMP4B	NLRP3	-0.228656	1.24e-14	#6495ED	1.37194
CHMP4B	NLRP6	0.129922	1.41118e-05	pink	0.779534
CHMP4B	NOD1	0.246742	7.38815e-17	pink	1.48045
CHMP4B	NOD2	0.249918	2.87521e-17	pink	1.49951
CHMP4B	PLCG1	0.581275	2.58994e-101	pink	3.48765
CHMP4B	PRKACA	0.142925	1.74437e-06	pink	0.85755
CHMP4B	PYCARD	0.206654	3.59e-12	pink	1.23992
CHMP4B	TNF	-0.119137	6.92188e-05	#6495ED	0.714822
CHMP4B	GZMA	-0.298102	3.2374e-24	#6495ED	1.78861
CHMP4C	CYCS	0.310013	3.74236e-26	pink	1.86008
CHMP4C	ELANE	-0.127824	1.94259e-05	#6495ED	0.766941
CHMP4C	HMGB1	0.305365	2.18609e-25	pink	1.83219
CHMP4C	IRF1	-0.128545	1.74134e-05	#6495ED	0.771272
CHMP4C	CASP6	0.344721	2.52088e-32	pink	2.06833
CHMP4C	CASP8	0.247	6.84654e-17	pink	1.482
CHMP4C	IL6	-0.132386	9.63661e-06	#6495ED	0.794314
CHMP4C	NLRP1	-0.210577	1.36627e-12	#6495ED	1.26346
CHMP4C	NLRP3	-0.150089	5.0785e-07	#6495ED	0.900536
CHMP4C	PRKACA	-0.131362	1.13018e-05	#6495ED	0.78817
CHMP4C	SCAF11	0.221495	8.39043e-14	pink	1.32897
CHMP4C	TNF	-0.117806	8.34823e-05	#6495ED	0.706834
CHMP6	CHMP7	0.187815	2.85379e-10	pink	1.12689
CHMP6	ELANE	0.187427	3.10842e-10	pink	1.12456
CHMP6	GSDMD	0.402924	1.41146e-44	pink	2.41754
CHMP6	HMGB1	-0.241549	3.36005e-16	#6495ED	1.44929
CHMP6	IL1A	-0.117704	8.46747e-05	#6495ED	0.706226
CHMP6	IRF1	0.129097	1.60116e-05	pink	0.77458
CHMP6	TP53	0.116525	9.97805e-05	pink	0.699152
CHMP6	CASP9	0.213836	6.03408e-13	pink	1.28302
CHMP6	GPX4	0.218594	1.78702e-13	pink	1.31156
CHMP6	GSDMC	0.160134	8.15082e-08	pink	0.960802
CHMP6	NLRP6	0.129224	1.57029e-05	pink	0.775346
CHMP6	NLRP7	0.174829	4.53529e-09	pink	1.04898
CHMP6	PRKACA	0.217904	2.13574e-13	pink	1.30742
CHMP6	PYCARD	0.219001	1.60791e-13	pink	1.31401
CHMP6	SCAF11	-0.277959	3.84259e-21	#6495ED	1.66776
CHMP6	TIRAP	0.126616	2.32947e-05	pink	0.759698
CHMP6	TNF	0.120047	6.08321e-05	pink	0.720281
CHMP7	IL18	0.150669	4.58425e-07	pink	0.904013
CHMP7	IL1B	0.194208	6.78751e-11	pink	1.16525
CHMP7	IRF1	0.245664	1.01475e-16	pink	1.47398
CHMP7	IRF2	0.222345	6.70976e-14	pink	1.33407
CHMP7	TP53	0.172677	7.03572e-09	pink	1.03606
CHMP7	TP63	0.165406	2.97687e-08	pink	0.992437
CHMP7	AIM2	0.186063	4.19361e-10	pink	1.11638
CHMP7	CASP9	0.178575	2.0851e-09	pink	1.07145
CHMP7	GSDMB	0.156784	1.51986e-07	pink	0.940705
CHMP7	GSDMC	0.120549	5.66273e-05	pink	0.723291
CHMP7	NLRC4	0.198207	2.69437e-11	pink	1.18924
CHMP7	NLRP1	0.178823	1.97926e-09	pink	1.07294
CHMP7	NLRP3	0.211234	1.15981e-12	pink	1.26741
CHMP7	GZMA	0.219539	1.39838e-13	pink	1.31723
CYCS	GSDMD	-0.184529	5.8564e-10	#6495ED	1.10718
CYCS	HMGB1	0.481093	2.28154e-65	pink	2.88656
CYCS	IL18	0.197296	3.33154e-11	pink	1.18378
CYCS	IRF2	0.116607	9.86535e-05	pink	0.699644
CYCS	CASP6	0.37706	8.01391e-39	pink	2.26236
CYCS	CASP8	0.402013	2.29715e-44	pink	2.41208
CYCS	GPX4	-0.282193	9.10037e-22	#6495ED	1.69316
CYCS	GSDMB	0.119152	6.9071e-05	pink	0.714913
CYCS	NLRP1	-0.130671	1.25761e-05	#6495ED	0.784026
CYCS	NLRP3	-0.152615	3.24142e-07	#6495ED	0.915689
CYCS	PYCARD	-0.130887	1.21639e-05	#6495ED	0.785321
CYCS	SCAF11	0.32754	3.60315e-29	pink	1.96524
ELANE	HMGB1	-0.134222	7.22005e-06	#6495ED	0.80533
ELANE	CASP9	0.130085	1.37641e-05	pink	0.780508
ELANE	GSDMB	-0.134025	7.44805e-06	#6495ED	0.80415
ELANE	NLRP1	0.185044	5.23769e-10	pink	1.11026
ELANE	NLRP3	0.157319	1.37707e-07	pink	0.943915
ELANE	PRKACA	0.132288	9.78456e-06	pink	0.793729
GSDMD	GZMB	0.243836	1.73213e-16	pink	1.46301
GSDMD	HMGB1	-0.300167	1.51618e-24	#6495ED	1.801
GSDMD	IL1A	-0.123881	3.49449e-05	#6495ED	0.743284
GSDMD	IRF1	0.435478	1.39994e-52	pink	2.61287
GSDMD	AIM2	0.18403	6.52557e-10	pink	1.10418
GSDMD	CASP8	-0.183214	7.78074e-10	#6495ED	1.09929
GSDMD	GPX4	0.287498	1.4446e-22	pink	1.72499
GSDMD	GSDMB	0.158294	1.14959e-07	pink	0.949763
GSDMD	GSDMC	0.121576	4.88597e-05	pink	0.729456
GSDMD	NLRP1	0.122893	4.0374e-05	pink	0.737356
GSDMD	NLRP6	0.196595	3.9192e-11	pink	1.17957
GSDMD	PYCARD	0.22136	8.69328e-14	pink	1.32816
GSDMD	SCAF11	-0.263074	4.9975e-19	#6495ED	1.57844
GSDMD	GZMA	0.252175	1.45865e-17	pink	1.51305
GZMB	IRF1	0.374742	2.48265e-38	pink	2.24845
GZMB	AIM2	0.253187	1.07334e-17	pink	1.51912
GZMB	GPX4	0.190154	1.69722e-10	pink	1.14092
GZMB	IL6	0.13848	3.64204e-06	pink	0.830881
GZMB	NLRC4	0.177969	2.36708e-09	pink	1.06781
GZMB	NOD1	0.179516	1.71087e-09	pink	1.07709
GZMB	NOD2	0.282004	9.71013e-22	pink	1.69202
GZMB	TNF	0.154733	2.2117e-07	pink	0.928397
GZMB	GZMA	0.370411	2.00165e-37	pink	2.22247
HMGB1	IL1B	-0.129617	1.47884e-05	#6495ED	0.7777
HMGB1	IRF1	-0.12247	4.2931e-05	#6495ED	0.734822
HMGB1	CASP6	0.293099	1.98243e-23	pink	1.75859
HMGB1	CASP8	0.417734	4.14528e-48	pink	2.50641
HMGB1	CASP9	-0.201352	1.28544e-11	#6495ED	1.20811
HMGB1	GPX4	-0.282287	8.81282e-22	#6495ED	1.69372
HMGB1	NOD1	0.195297	5.28784e-11	pink	1.17178
HMGB1	NOD2	0.13287	8.93317e-06	pink	0.79722
HMGB1	PLCG1	0.162355	5.35285e-08	pink	0.974133
HMGB1	SCAF11	0.57623	3.38559e-99	pink	3.45738
IL18	IL1A	0.199531	1.97616e-11	pink	1.19719
IL18	IL1B	0.181923	1.02639e-09	pink	1.09154
IL18	IRF1	0.238618	7.77665e-16	pink	1.43171
IL18	IRF2	0.258451	2.13159e-18	pink	1.55071
IL18	AIM2	0.258862	1.87575e-18	pink	1.55317
IL18	CASP8	0.292403	2.54326e-23	pink	1.75442
IL18	GPX4	-0.140854	2.46518e-06	#6495ED	0.845121
IL18	GSDMB	0.333879	2.60538e-30	pink	2.00327
IL18	NLRC4	0.197202	3.40527e-11	pink	1.18321
IL18	NLRP3	0.126144	2.50006e-05	pink	0.756861
IL18	NLRP7	0.144438	1.35082e-06	pink	0.866628
IL18	NOD1	-0.136982	4.64445e-06	#6495ED	0.82189
IL18	NOD2	-0.172175	7.78814e-09	#6495ED	1.03305
IL18	PLCG1	-0.421223	5.74625e-49	#6495ED	2.52734
IL18	PRKACA	-0.131488	1.10821e-05	#6495ED	0.788929
IL18	GZMA	0.321401	4.32628e-28	pink	1.92841
IL1A	IL1B	0.598972	4.87552e-109	pink	3.59383
IL1A	TP63	0.157493	1.33351e-07	pink	0.944959
IL1A	GPX4	-0.204558	5.96886e-12	#6495ED	1.22735
IL1A	GSDMB	0.165182	3.10895e-08	pink	0.991094
IL1A	IL6	0.326142	6.37895e-29	pink	1.95685
IL1A	NLRP3	0.298298	3.01335e-24	pink	1.78979
IL1A	NLRP6	-0.135663	5.74013e-06	#6495ED	0.81398
IL1A	NOD1	-0.175826	3.69421e-09	#6495ED	1.05496
IL1A	PLCG1	-0.29867	2.6288e-24	#6495ED	1.79202
IL1A	PRKACA	-0.16671	2.30902e-08	#6495ED	1.00026
IL1A	SCAF11	0.170289	1.13766e-08	pink	1.02173
IL1A	TNF	0.267747	1.12011e-19	pink	1.60648
IL1B	IRF1	0.248111	4.92757e-17	pink	1.48866
IL1B	IRF2	0.177925	2.38878e-09	pink	1.06755
IL1B	AIM2	0.134288	7.14494e-06	pink	0.805726
IL1B	CASP9	0.129717	1.4563e-05	pink	0.778302
IL1B	GPX4	-0.146113	1.01469e-06	#6495ED	0.876677
IL1B	GSDMC	0.208868	2.08616e-12	pink	1.25321
IL1B	IL6	0.670206	1.18593e-145	pink	4.02124
IL1B	NLRC4	0.332614	4.42188e-30	pink	1.99569
IL1B	NLRP1	0.157075	1.44062e-07	pink	0.942448
IL1B	NLRP3	0.555228	9.04198e-91	pink	3.33137
IL1B	PLCG1	-0.265801	2.09565e-19	#6495ED	1.59481
IL1B	TNF	0.433956	3.47078e-52	pink	2.60373
IL1B	GZMA	0.252606	1.28032e-17	pink	1.51563
IRF1	IRF2	0.31646	3.06871e-27	pink	1.89876
IRF1	AIM2	0.615004	1.82384e-116	pink	3.69002
IRF1	CASP6	-0.179476	1.72537e-09	#6495ED	1.07685
IRF1	GSDMB	0.312669	1.34564e-26	pink	1.87601
IRF1	GSDMC	0.195152	5.46622e-11	pink	1.17091
IRF1	IL6	0.260644	1.07495e-18	pink	1.56387
IRF1	NLRC4	0.301959	7.81168e-25	pink	1.81175
IRF1	NLRP1	0.264001	3.72346e-19	pink	1.58401
IRF1	NLRP3	0.286593	1.98289e-22	pink	1.71956
IRF1	NLRP6	0.128857	1.66081e-05	pink	0.77314
IRF1	NLRP7	0.192342	1.03746e-10	pink	1.15405
IRF1	PLCG1	-0.17542	4.01674e-09	#6495ED	1.05252
IRF1	PYCARD	0.118927	7.13038e-05	pink	0.713562
IRF1	TNF	0.301528	9.16522e-25	pink	1.80917
IRF1	GZMA	0.679494	3.38116e-151	pink	4.07696
IRF2	TP53	0.152901	3.07925e-07	pink	0.917405
IRF2	AIM2	0.252743	1.2281e-17	pink	1.51646
IRF2	CASP8	0.25977	1.41344e-18	pink	1.55862
IRF2	CASP9	0.158824	1.04164e-07	pink	0.952941
IRF2	NLRC4	0.283558	5.6897e-22	pink	1.70135
IRF2	NLRP1	0.192759	9.43964e-11	pink	1.15655
IRF2	NLRP3	0.230012	8.57017e-15	pink	1.38007
IRF2	PLCG1	-0.191679	1.20513e-10	#6495ED	1.15007
IRF2	PRKACA	0.180581	1.36591e-09	pink	1.08348
IRF2	SCAF11	0.200373	1.62046e-11	pink	1.20224
IRF2	TIRAP	0.293435	1.7573e-23	pink	1.76061
IRF2	TNF	0.135438	5.95028e-06	pink	0.81263
IRF2	GZMA	0.338328	3.97121e-31	pink	2.02997
TP53	TIRAP	0.141251	2.30781e-06	pink	0.847506
TP63	AIM2	0.144715	1.28861e-06	pink	0.868291
TP63	CASP6	-0.146497	9.49894e-07	#6495ED	0.878979
TP63	CASP9	0.142286	1.94194e-06	pink	0.853714
TP63	GSDMC	0.300926	1.14572e-24	pink	1.80555
TP63	NLRC4	0.15263	3.23284e-07	pink	0.915777
TP63	NLRP1	0.176123	3.47404e-09	pink	1.05674
TP63	NLRP3	0.195467	5.08469e-11	pink	1.1728
TP63	NLRP7	0.140295	2.70407e-06	pink	0.841768
TP63	TNF	0.136905	4.70249e-06	pink	0.821429
AIM2	CASP6	-0.137025	4.61234e-06	#6495ED	0.822148
AIM2	CASP8	0.147196	8.41878e-07	pink	0.883175
AIM2	GSDMB	0.159687	8.86321e-08	pink	0.958124
AIM2	GSDMC	0.178732	2.01733e-09	pink	1.07239
AIM2	IL6	0.196095	4.39997e-11	pink	1.17657
AIM2	NLRC4	0.378073	4.87601e-39	pink	2.26844
AIM2	NLRP1	0.34585	1.53937e-32	pink	2.0751
AIM2	NLRP3	0.287204	1.60162e-22	pink	1.72322
AIM2	NLRP7	0.1401	2.79216e-06	pink	0.840602
AIM2	PLCG1	-0.254398	7.42394e-18	#6495ED	1.52639
AIM2	SCAF11	0.17898	1.91502e-09	pink	1.07388
AIM2	TNF	0.222229	6.91824e-14	pink	1.33337
AIM2	GZMA	0.551894	1.73539e-89	pink	3.31136
CASP6	CASP8	0.351366	1.3404e-33	pink	2.10819
CASP6	GSDMC	-0.130123	1.36841e-05	#6495ED	0.780736
CASP6	IL6	-0.206123	4.08613e-12	#6495ED	1.23674
CASP6	NLRC4	-0.201272	1.31006e-11	#6495ED	1.20763
CASP6	NLRP1	-0.226879	2.00514e-14	#6495ED	1.36127
CASP6	NLRP3	-0.273585	1.65813e-20	#6495ED	1.64151
CASP6	SCAF11	0.208165	2.47999e-12	pink	1.24899
CASP6	TNF	-0.135755	5.65657e-06	#6495ED	0.81453
CASP6	GZMA	-0.119784	6.31469e-05	#6495ED	0.718706
CASP8	GPX4	-0.277901	3.91889e-21	#6495ED	1.66741
CASP8	GSDMB	0.195188	5.42113e-11	pink	1.17113
CASP8	NLRC4	0.1455	1.12701e-06	pink	0.873003
CASP8	SCAF11	0.33764	5.32396e-31	pink	2.02584
CASP8	TIRAP	0.316769	2.7174e-27	pink	1.90061
CASP8	GZMA	0.126225	2.46979e-05	pink	0.757351
CASP9	GSDMC	0.134236	7.20409e-06	pink	0.805414
CASP9	NLRP3	0.153349	2.84092e-07	pink	0.920093
CASP9	PRKACA	0.170712	1.0453e-08	pink	1.02427
CASP9	TIRAP	0.220341	1.13466e-13	pink	1.32205
GPX4	GSDMB	-0.218232	1.96229e-13	#6495ED	1.30939
GPX4	PLCG1	0.163248	4.51365e-08	pink	0.979487
GPX4	PRKACA	0.151655	3.84788e-07	pink	0.90993
GPX4	PYCARD	0.20443	6.15555e-12	pink	1.22658
GPX4	SCAF11	-0.379214	2.78084e-39	#6495ED	2.27528
GSDMB	NOD2	-0.131862	1.04569e-05	#6495ED	0.791171
GSDMB	PLCG1	-0.263051	5.03444e-19	#6495ED	1.57831
GSDMB	GZMA	0.228989	1.13267e-14	pink	1.37393
GSDMC	IL6	0.237943	9.41932e-16	pink	1.42766
GSDMC	NLRC4	0.273646	1.6251e-20	pink	1.64187
GSDMC	NLRP1	0.243006	2.20434e-16	pink	1.45804
GSDMC	NLRP3	0.313338	1.03798e-26	pink	1.88003
GSDMC	TNF	0.180239	1.46859e-09	pink	1.08143
GSDMC	GZMA	0.14669	9.18706e-07	pink	0.880142
IL6	NLRC4	0.367732	7.16637e-37	pink	2.20639
IL6	NLRP1	0.318006	1.66897e-27	pink	1.90803
IL6	NLRP3	0.534861	3.74597e-83	pink	3.20916
IL6	NOD2	0.158934	1.02034e-07	pink	0.953606
IL6	PLCG1	-0.118012	8.11083e-05	#6495ED	0.70807
IL6	TNF	0.399659	8.02892e-44	pink	2.39795
IL6	GZMA	0.233118	3.64475e-15	pink	1.39871
NLRC4	NLRP1	0.390394	1.00382e-41	pink	2.34236
NLRC4	NLRP3	0.588276	2.59507e-104	pink	3.52965
NLRC4	NLRP7	0.167316	2.05044e-08	pink	1.00389
NLRC4	NOD1	0.15436	2.36646e-07	pink	0.926161
NLRC4	NOD2	0.174835	4.52979e-09	pink	1.04901
NLRC4	PRKACA	0.133884	7.61649e-06	pink	0.803301
NLRC4	SCAF11	0.189838	1.82104e-10	pink	1.13903
NLRC4	TIRAP	0.123894	3.48753e-05	pink	0.743365
NLRC4	TNF	0.325641	7.82217e-29	pink	1.95384
NLRC4	GZMA	0.42485	7.18477e-50	pink	2.5491
NLRP1	NLRP2	0.131546	1.09827e-05	pink	0.789277
NLRP1	NLRP3	0.42604	3.61184e-50	pink	2.55624
NLRP1	NOD1	0.294165	1.35131e-23	pink	1.76499
NLRP1	PRKACA	0.219125	1.55723e-13	pink	1.31475
NLRP1	SCAF11	0.133612	7.94928e-06	pink	0.801675
NLRP1	TNF	0.290568	4.89099e-23	pink	1.74341
NLRP1	GZMA	0.27712	5.0975e-21	pink	1.66272
NLRP3	NOD1	0.148069	7.23505e-07	pink	0.888414
NLRP3	NOD2	0.127183	2.13965e-05	pink	0.763096
NLRP3	PRKACA	0.16775	1.88243e-08	pink	1.0065
NLRP3	TIRAP	0.126444	2.39027e-05	pink	0.758665
NLRP3	TNF	0.42474	7.65684e-50	pink	2.54844
NLRP3	GZMA	0.300259	1.46555e-24	pink	1.80156
NLRP6	PLCG1	0.123781	3.54576e-05	pink	0.742688
NLRP6	SCAF11	-0.138182	3.82319e-06	#6495ED	0.829094
NLRP7	TNF	0.157248	1.39517e-07	pink	0.943491
NLRP7	GZMA	0.24689	7.0718e-17	pink	1.48134
NOD1	NOD2	0.260393	1.16303e-18	pink	1.56236
NOD1	PLCG1	0.401196	3.55081e-44	pink	2.40718
NOD1	PRKACA	0.260847	1.00882e-18	pink	1.56508
NOD1	SCAF11	0.170265	1.14305e-08	pink	1.02159
NOD1	TIRAP	0.170657	1.0569e-08	pink	1.02394
NOD2	PLCG1	0.316365	3.18446e-27	pink	1.89819
NOD2	PYCARD	0.196713	3.81411e-11	pink	1.18028
NOD2	TIRAP	0.171649	8.65965e-09	pink	1.02989
NOD2	TNF	0.184605	5.76166e-10	pink	1.10763
PLCG1	PRKACA	0.24908	3.69362e-17	pink	1.49448
PLCG1	GZMA	-0.327663	3.4262e-29	#6495ED	1.96598
PRKACA	TIRAP	0.154828	2.17382e-07	pink	0.928967
PRKACA	TNF	0.137499	4.27204e-06	pink	0.824992
PYCARD	SCAF11	-0.274808	1.10471e-20	#6495ED	1.64885
TNF	GZMA	0.237424	1.09107e-15	pink	1.42454
